# Supplementary material for: Delivering carbide ligands to sulfide-rich clusters
Source: Royal Society of Chemistry journal article supplement (doi:10.1039/c5cc08918b), 2015-11-18
Supplement: c5cc08918b1.pdf [file c5cc08918b1.pdf]

## Supporting information

For

### Delivering carbide moieties to sulfide-rich clusters

Anders Reinholdt,<sup>a</sup> Konrad Herbst,<sup>b</sup> Jesper Bendix<sup>a,\*</sup>

<sup>a</sup>. *Department of Chemistry, University of Copenhagen, Universitetsparken 5, DK-2100, Denmark*

Telephone: +45 35320101; Email: [bendix@kiku.dk](mailto:bendix@kiku.dk)

<sup>b</sup>. *Haldor Topsøe A/S, Haldor Topsøes Allé 1, DK-2800 Kongens Lyngby, Denmark*

|                              |     |
|------------------------------|-----|
| <b>Contents</b>              | S1  |
| <b>Materials and methods</b> | S2  |
| <b>Syntheses</b>             | S3  |
| <b>Physical measurements</b> | S7  |
| <b>Supporting figures</b>    | S10 |
| <b>References</b>            | S24 |

## Materials and methods

Unless otherwise stated, no precautions were taken to protect the reaction mixtures from air. Acetonitrile (Riedel-de Haën, >99.9%), chloroform (Sigma-Aldrich, HPLC,  $\geq 99.8\%$ ), chloroform-*d* (Sigma-Aldrich, 99.8% D), dichloromethane (Sigma-Aldrich, HPLC,  $\geq 99.8\%$ ), diethyl ether (VWR Chemicals), pentane (Sigma-Aldrich, HPLC,  $\geq 99.0$ ), and tetrabutylammonium hexafluorophosphate (Sigma-Aldrich, 98%) were purchased from commercial suppliers and used as received. Ru(C)Cl<sub>2</sub>(PCy<sub>3</sub>)<sub>2</sub> (**RuC**) was synthesized according to the published procedure;<sup>1</sup> **Ru**<sup>13</sup>C was obtained with <sup>13</sup>CH<sub>2</sub><sup>13</sup>CH–O<sub>2</sub>CCH<sub>3</sub> (Sigma-Aldrich, 99% <sup>13</sup>C). [(MCp')<sub>3</sub>S<sub>4</sub>M'L]OTs (M = Mo or W, M'L = Pd(dba) or Pt(nor),<sup>2, 3</sup> ttcn,<sup>4</sup> [Cu(NCCH<sub>3</sub>)<sub>4</sub>]BF<sub>4</sub>,<sup>5</sup> [Ag(ttcn)]<sub>4</sub>(OTf)<sub>4</sub>,<sup>6</sup> [AuCl(tht)],<sup>7</sup> and (PNP)[(Cy<sub>3</sub>P)<sub>2</sub>Cl<sub>2</sub>Ru≡C–PdCl<sub>3</sub>]<sup>8</sup> were prepared according to published procedures. [Ag(tht)<sub>2</sub>]OTf (OTf<sup>-</sup> replacing ClO<sub>4</sub><sup>-</sup>) was prepared by the obvious modification of the published procedure.<sup>9</sup>

## Syntheses

**[(Cy<sub>3</sub>P)<sub>2</sub>Cl<sub>2</sub>Ru≡C–M'(MCp')<sub>3</sub>S<sub>4</sub>]OTs (1 – 4).** General procedure for **1 – 4**. In the dark and under a nitrogen atmosphere, equimolar amounts of **RuC** and [(MCp')<sub>3</sub>S<sub>4</sub>M'L]OTs (typically 20 – 50 μmol) were dissolved in either CH<sub>2</sub>Cl<sub>2</sub> or CHCl<sub>3</sub> (2 – 5 ml) and stirred until the formation of [(Cy<sub>3</sub>P)<sub>2</sub>Cl<sub>2</sub>Ru≡C–M'(MCp')<sub>3</sub>S<sub>4</sub>]<sup>+</sup> was complete. Typically, **1** and **3** require 3 hours of stirring at room temperature, **4** requires one day at room temperature, and **2** requires five days at refluxing temperature (CHCl<sub>3</sub>). The Pd complexes **1** and **3** were isolated by adding diethyl ether to the reaction mixtures (typically five or ten-fold solvent volume) followed by several washings with diethyl ether, and drying *in vacuo*. Solutions of crude **2** were concentrated to 1 ml, and pentane vapour was allowed to diffuse into the solution, yielding dark needle crystals that were centrifuged off, washed with pentane and dried *in vacuo*. Crude **4** was evaporated to dryness, washed with pentane, and dried *in vacuo*. Yields 72 – 84%. Note: for the isolation of **1** and **3**, diethyl ether is preferred over pentane, as it readily dissolves dba, which colours the washings yellowish brown. X-ray-quality crystals of **1** and **3** were grown by diffusion of diethyl ether into chloroform solutions containing equal amounts of [(Cy<sub>3</sub>P)<sub>2</sub>Cl<sub>2</sub>Ru≡C–Pd(MCp')<sub>3</sub>S<sub>4</sub>]OTs and (PNP)[(Cy<sub>3</sub>P)<sub>2</sub>Cl<sub>2</sub>Ru≡C–PdCl<sub>3</sub>] (PNP<sup>+</sup> = bis(triphenylphosphoranylidene)iminium), affording the complex cations as their [(Cy<sub>3</sub>P)<sub>2</sub>Cl<sub>2</sub>Ru≡C–PdCl<sub>3</sub>]<sup>–</sup> salts. X-ray-quality crystals of **2** and **4** were grown from chloroform by diffusion of pentane, affording the complex cations as their tosylate salts.

**[(Cy<sub>3</sub>P)<sub>2</sub>Cl<sub>2</sub>Ru≡C–Pd(MoCp')<sub>3</sub>S<sub>4</sub>]OTs (1).** <sup>1</sup>H-NMR, 500 MHz, CDCl<sub>3</sub>, δ: 7.83 (d, *J* = 7.8 Hz, 2H), 7.10 (d, *J* = 7.8 Hz, 2H), 5.74 (d, *J* = 1.8 Hz, 6H), 5.73 (d, *J* = 1.8 Hz, 6H), 2.67 – 2.51 (m, 6H), 2.31 (s, 3H), 2.11 – 2.03 (m, 12H), 2.02 (s, 9H), 1.94 – 1.85 (m, 12H), 1.83 – 1.76 (m, 6H), 1.56 – 1.44 (m, 12H), 1.35 – 1.22 (m, 18H). <sup>13</sup>C-NMR, 126 MHz, CDCl<sub>3</sub>, δ: 429.75, 144.78, 138.52, 128.43, 126.32, 115.70, 95.48, 93.81, 32.56 (t, *J* = 9.6 Hz), 30.51, 28.23 (t, *J* = 5.1 Hz), 26.76, 21.45, 15.68. <sup>31</sup>P-NMR, 121 MHz, CDCl<sub>3</sub>, δ: 35.53. ESI<sup>+</sup> MS, CH<sub>3</sub>CN, *m/z*, *f/c*: [(Cy<sub>3</sub>P)<sub>2</sub>Cl<sub>2</sub>Ru≡C–Pd(MoCp')<sub>3</sub>S<sub>4</sub>]<sup>+</sup> 1505.02 / 1504.98. Elemental analysis, calculated for C<sub>62</sub>H<sub>94</sub>Cl<sub>2</sub>Mo<sub>3</sub>O<sub>3</sub>P<sub>2</sub>PdRuS<sub>5</sub> · ¾ CHCl<sub>3</sub>: C: 42.69%, H: 5.41%; found C: 42.72%, H: 5.25%.

**[(Cy<sub>3</sub>P)<sub>2</sub>Cl<sub>2</sub>Ru≡C–Pt(MoCp')<sub>3</sub>S<sub>4</sub>]OTs (2).** <sup>1</sup>H-NMR, 500 MHz, CDCl<sub>3</sub>, δ: 7.84 (d, *J* = 7.6 Hz, 2H), 7.11 (d, *J* = 7.7 Hz, 2H), 5.71 – 5.65 (m, 6H), 5.65 – 5.58 (m, 6H), 2.69 – 2.58 (m, 6H), 2.31 (s, 3H), 2.18 – 2.07 (m, 12H), 2.10 (s, 9H), 1.91 – 1.85 (m, 12H), 1.82 – 1.78 (m, 6H), 1.57 – 1.46 (m, 12H), 1.35 – 1.23 (m, 18H). <sup>13</sup>C-NMR, 126 MHz, CDCl<sub>3</sub>, δ: 385.41 (s and d, *J* = 2416.6 Hz), 144.72, 138.57, 128.45,

126.33, 114.97, 94.60, 93.06, 32.92 (t,  $J = 9.4$  Hz), 30.65, 28.23 (t,  $J = 4.5$  Hz), 26.72, 21.46, 15.61.  $^{31}\text{P}$ -NMR, 121 MHz,  $\text{CDCl}_3$ ,  $\delta$ : 32.75. ESI<sup>+</sup> MS,  $\text{CH}_3\text{CN}$ ,  $m/z$ ,  $f/c$ :  $[(\text{Cy}_3\text{P})_2\text{Cl}_2\text{Ru}\equiv\text{C}-\text{Pt}(\text{MoCp}')_3\text{S}_4]^+$  1594.05 / 1593.04 (the carbide ligand was  $^{13}\text{C}$ -labelled, explaining the  $m/z$  gain of 1). Elemental analysis, calculated for  $\text{C}_{62}\text{H}_{94}\text{Cl}_2\text{Mo}_3\text{O}_3\text{P}_2\text{PtRuS}_5 \cdot \frac{3}{4} \text{CHCl}_3$ : C: 40.65%, H: 5.15%; found C: 40.86%, H: 5.18%.

**$[(\text{Cy}_3\text{P})_2\text{Cl}_2\text{Ru}\equiv\text{C}-\text{Pd}(\text{WCp}')_3\text{S}_4]\text{OTs}$  (3).**  $^1\text{H}$ -NMR, 300 MHz,  $\text{CDCl}_3$ ,  $\delta$ : 7.84 (d,  $J = 6.1$  Hz, 2H), 7.11 (d,  $J = 7.1$  Hz, 2H), 5.91 – 5.83 (2 m, 12H), 2.66 – 2.49 (m, 6H), 2.32 (s, 3H), 2.21 (s, 9H), 2.16 – 1.99 (m, 12H), 1.98 – 1.85 (m, 12H), 1.85 – 1.73 (m, 6H), 1.60 – 1.42 (m, 12H), 1.36 – 1.23 (m, 18H).  $^{13}\text{C}$ -NMR (126 MHz, Chloroform-*d*)  $\delta$  421.40, 144.83, 138.51, 128.44, 126.32, 114.60, 94.07, 91.44, 32.49 (t,  $J = 9.5$  Hz), 30.55, 28.28, 26.82, 21.46, 15.63.  $^{31}\text{P}$ -NMR, 121 MHz,  $\text{CDCl}_3$ ,  $\delta$ : 34.63. FAB<sup>+</sup> MS, *m*-NBA,  $m/z$ ,  $f/c$ :  $[(\text{Cy}_3\text{P})_2\text{Cl}_2\text{Ru}\equiv\text{C}-\text{Pd}(\text{WCp}')_3\text{S}_4]^+$  1769.6 / 1769.12,  $[(\text{Cy}_3\text{P})_2\text{Cl}_2\text{Ru}\equiv\text{C}-\text{Pd}(\text{WCp}')_3\text{S}_4 - \text{PCy}_3]^+$  1488.8 / 1488.88,  $[(\text{Cy}_3\text{P})_2\text{Cl}_2\text{Ru}\equiv\text{C}-\text{Pd}(\text{WCp}')_3\text{S}_4 - \text{PCy}_3 - \text{Cl}]^+$  1453.1 / 1451.92,  $[\text{Pd}(\text{WCp}')_3\text{S}_4]^+$  1023.6 / 1022.81,  $[(\text{WCp}')_3\text{S}_4]^+$  917.0 / 916.91. Elemental analysis, calculated for  $\text{C}_{62}\text{H}_{94}\text{Cl}_2\text{O}_3\text{P}_2\text{PdRuS}_5\text{W}_3 \cdot 1.5 \text{CHCl}_3$ : C: 36.00%, H: 4.54%; found C: 36.10%, H: 4.25%.

**$[(\text{Cy}_3\text{P})_2\text{Cl}_2\text{Ru}\equiv\text{C}-\text{Pt}(\text{WCp}')_3\text{S}_4]\text{OTs}$  (4).**  $^1\text{H}$ -NMR, 500 MHz,  $\text{CDCl}_3$ ,  $\delta$ : 7.83 (d,  $J = 7.8$  Hz, 2H), 7.11 (d,  $J = 7.8$  Hz, 2H), 5.82 – 5.78 (m, 6H), 5.76 – 5.72 (m, 6H), 2.68 – 2.56 (m, 6H), 2.32 (s, 3H), 2.28 (s, 9H), 2.17 – 2.09 (m, 12H), 1.92 – 1.86 (m, 12H), 1.82 – 1.76 (m, 6H), 1.57 – 1.47 (m, 12H), 1.34 – 1.24 (m, 18H).  $^{13}\text{C}$ -NMR, 126 MHz,  $\text{CDCl}_3$ ,  $\delta$ : 378.15 (t,  $J = 5.5$  Hz and d,  $J = 2600.4$  Hz), 144.74, 138.59, 128.47, 126.31, 113.85, 93.09, 90.48, 32.83 (t,  $J = 9.5$  Hz), 30.68, 28.27 (t,  $J = 4.9$  Hz), 26.79, 21.46, 15.50.  $^{31}\text{P}$ -NMR, 121 MHz,  $\text{CDCl}_3$ ,  $\delta$ : 31.97. FAB<sup>+</sup> MS, *m*-NBA matrix,  $m/z$ ,  $f/c$ :  $[(\text{Cy}_3\text{P})_2\text{Cl}_2\text{Ru}\equiv\text{C}-\text{Pt}(\text{WCp}')_3\text{S}_4]^+$  1855.6 / 1857.18,  $[(\text{Cy}_3\text{P})_2\text{Cl}_2\text{Ru}\equiv\text{C}-\text{Pt}(\text{WCp}')_3\text{S}_4 - \text{PCy}_3]^+$  1574.2 / 1576.94,  $[(\text{WCp}')_3\text{S}_4]^+$  915.8 / 916.91. Elemental analysis, calculated for  $\text{C}_{62}\text{H}_{94}\text{Cl}_2\text{O}_3\text{P}_2\text{PtRuS}_5\text{W}_3 \cdot \frac{1}{2} \text{CHCl}_3$ : C: 35.95%, H: 4.56%; found C: 36.01%, H: 4.32%.

**$[(\text{Cy}_3\text{P})_2\text{Cl}_2\text{Ru}\equiv\text{C}-\text{Cu}(\text{ttcn})]\text{BF}_4$  (5).** Under a nitrogen atmosphere,  $[\text{Cu}(\text{NCCH}_3)_4]\text{BF}_4$  (13.8 mg, 43.9  $\mu\text{mol}$ ) and *ttcn* (7.9 mg, 44  $\mu\text{mol}$ ) were dissolved in 10 ml nitrogen-purged acetonitrile and heated to reflux temperature for one hour. During this time, the initially intense yellow colour faded to become nearly colourless. **RuC** (32.7 mg, 43.9  $\mu\text{mol}$ ) in 10 ml nitrogen-purged chloroform was added, and the solution was kept at reflux temperature for 15 minutes. The solvents were evaporated off, and the dry residue was dissolved in 1 ml chloroform. Diethyl ether vapour was allowed to diffuse into the solution over 2 days. Yellow crystals of  $[(\text{Cy}_3\text{P})_2\text{Cl}_2\text{Ru}\equiv\text{C}-\text{Cu}(\text{ttcn})]\text{BF}_4$  (5) were decanted off, washed with

diethyl ether (2 x 2 ml), and dried *in vacuo*. Yield of **5**: 39.1 mg, 36.4  $\mu\text{mol}$ , 82.8% based on **RuC**.  $^1\text{H}$ -NMR, 500 MHz,  $\text{CDCl}_3$ ,  $\delta$ : 3.14 – 3.01 (m, 6H), 2.85 – 2.75 (m, 6H), 2.74 – 2.60 (m, 6H), 2.19 – 2.05 (m, 12H), 1.87 – 1.78 (m, 12H), 1.78 – 1.72 (m, 6H), 1.60 – 1.48 (m, 12H), 1.34 – 1.17 (m, 18H).  $^{13}\text{C}$ -NMR, 126 MHz,  $\text{CDCl}_3$ ,  $\delta$ : 431.69, 32.41, 32.03 (t,  $J = 9.9$  Hz), 30.26, 28.06 (t,  $J = 5.2$  Hz), 26.54.  $^{31}\text{P}$ -NMR, 121 MHz,  $\text{CDCl}_3$ ,  $\delta$ : 41.02.  $^{19}\text{F}$ -NMR, 282 MHz,  $\text{CDCl}_3$ ,  $\delta$ : –152.62. ESI<sup>+</sup> MS,  $\text{CH}_3\text{CN}$ ,  $m/z$ ,  $f/c$ :  $[(\text{Cy}_3\text{P})_2\text{Cl}_2\text{Ru}\equiv\text{C}-\text{Cu}(\text{ttcn})]^+$  989.26 / 989.24. Elemental analysis, calculated for  $\text{C}_{43}\text{H}_{78}\text{BCl}_2\text{CuF}_4\text{P}_2\text{RuS}_3$ : C: 48.02%, H: 7.31%; found C: 47.85%, H: 7.34%.

**$[(\text{Cy}_3\text{P})_2\text{Cl}_2\text{Ru}\equiv\text{C}-\text{Ag}(\text{ttcn})]\text{OTf}$  (**6**)**.  $[\text{Ag}(\text{ttcn})]_4(\text{OTf})_4$  (10.2 mg, 5.83  $\mu\text{mol}$ ) and **RuC** (17.4 mg, 23.4  $\mu\text{mol}$ ) were dissolved in 5 ml chloroform and heated to reflux temperature for one hour. After filtering, the solvent was evaporated off, leaving a yellow residue of  $[(\text{Cy}_3\text{P})_2\text{Cl}_2\text{Ru}\equiv\text{C}-\text{Ag}(\text{ttcn})]\text{OTf}$  that was washed with diethyl ether (3 x 5 ml), and dried *in vacuo*. Yield of **6** ·  $\frac{1}{3}$   $\text{CHCl}_3$ : 24.7 mg, 20.2  $\mu\text{mol}$ , 86.5% based on **RuC**.  $^1\text{H}$ -NMR, 300 MHz,  $\text{CDCl}_3$ ,  $\delta$ : 3.30 – 3.07 (m, 6H), 2.84 – 2.59 (m, 12H), 2.23 – 2.04 (m, 12H), 1.94 – 1.69 (m, 18H), 1.69 – 1.47 (m, 12H), 1.40 – 1.19 (m, 18H).  $^{13}\text{C}$ -NMR, 126 MHz,  $\text{CDCl}_3$ ,  $\delta$ : 431.84 (d,  $J = 175.4$  Hz), 120.81 (q,  $J = 320.2$  Hz), 32.22 (t,  $J = 9.9$  Hz), 30.30, 29.98, 28.07 (t,  $J = 5.2$  Hz), 26.55.  $^{31}\text{P}$ -NMR, 121 MHz,  $\text{CDCl}_3$ ,  $\delta$ : 42.28.  $^{19}\text{F}$ -NMR, 282 MHz,  $\text{CDCl}_3$ ,  $\delta$ : –78.72. ESI<sup>+</sup> MS,  $\text{CH}_3\text{CN}$ ,  $m/z$ ,  $f/c$ :  $[(\text{Cy}_3\text{P})_2\text{Cl}_2\text{Ru}\equiv\text{C}-\text{Ag}(\text{ttcn})]^+$  1033.23 / 1033.22. Elemental analysis, calculated for  $\text{C}_{44}\text{H}_{78}\text{AgCl}_2\text{F}_3\text{O}_3\text{P}_2\text{RuS}_4 \cdot \frac{1}{3} \text{CHCl}_3$ : C: 43.58%, H: 6.46%; found C: 43.61%, H: 6.39%.

**$[(\text{Cy}_3\text{P})_2\text{Cl}_2\text{Ru}\equiv\text{C}-\text{Au}(\text{ttcn})]\text{OTf}$  (**7**)**.  $\text{AuCl}(\text{tht})$  (1.7 mg, 5.3  $\mu\text{mol}$ ) and  $[\text{Ag}(\text{tht})_2]\text{OTf}$  (2.3 mg, 5.3  $\mu\text{mol}$ ) were dissolved in 0.3 ml  $\text{CDCl}_3$  and stirred for 5 minutes, producing a white precipitate of  $\text{AgCl}$ . With an additional 0.3 ml  $\text{CDCl}_3$ ,  $\text{ttcn}$  (1.0 mg, 5.5  $\mu\text{mol}$ ) was added, and the solution was stirred for five minutes. Finally, **Ru**<sup>13</sup>**C** (4.0 mg, 5.4  $\mu\text{mol}$  in 0.2 ml  $\text{CDCl}_3$ ) was added, the solution was stirred for ten minutes and analysed by NMR. As **7** decomposes and occurs along with  $(\text{Cy}_3\text{P})_2\text{Cl}_2\text{Ru}\equiv\text{C}-\text{AuCl}$  and  $\text{tht}$ , the most informative spectroscopic data are:  $^{13}\text{C}$ -NMR, 126 MHz,  $\text{CDCl}_3$ ,  $\delta$ : 414.12 (t,  $J = 5.0$  Hz).  $^{31}\text{P}$ -NMR, 121 MHz,  $\text{CDCl}_3$ ,  $\delta$ : 40.70. ESI<sup>+</sup> MS,  $\text{CH}_3\text{CN}$ ,  $m/z$ ,  $f/c$ :  $[(\text{Cy}_3\text{P})_2\text{Cl}_2\text{Ru}\equiv\text{C}-\text{Au}(\text{ttcn})]^+$  1123.31 / 1123.28. For spectra, see Figures S10 – S14.

**Conversion of **5** to **3****. Solid **5** (1.1 mg, 1.0  $\mu\text{mol}$ ) was dissolved in 0.5 ml  $\text{CDCl}_3$ ; the  $^1\text{H}$ -NMR and  $^{31}\text{P}$ -NMR spectra showed only resonances from **5**.  $[(\text{WCp}^*)_3\text{S}_4\text{Pd}(\text{dba})]\text{OTs}$  (1.4 mg, 0.98  $\mu\text{mol}$ ) was added to the solution. After 15 minutes,  $^1\text{H}$  and  $^{31}\text{P}$  NMR spectra showed only resonances from **5**. After 21 h,

resonances from **3** and **5** were visible, having the ratio 2:5 (by  $^1\text{H}$  integrals, see Figure S15) and 1:3 (by  $^{31}\text{P}$  integrals, see Figure S16).

## Physical measurements

**NMR-spectroscopy:**  $^{31}\text{P}\{^1\text{H}\}$ -NMR and  $^{19}\text{F}$ -NMR spectra were recorded on a 300 MHz Varian instrument.  $^{13}\text{C}\{^1\text{H}\}$ -NMR spectra were recorded on a 500 MHz Bruker instrument with a cryoprobe, and  $^1\text{H}$ -NMR spectra were recorded on a 300 MHz Varian instrument or a 500 MHz Bruker instrument with a cryoprobe.  $^1\text{H}$  and  $^{13}\text{C}$  resonances were referenced to residual solvent signals ( $\text{CDCl}_3$ :  $\delta = 7.26$ ,  $^1\text{H}$ , and 77.16 ppm,  $^{13}\text{C}$ ).  $^{31}\text{P}$  and  $^{19}\text{F}$  signals were referenced to the deuterium resonances arising from the solvents.

**Mass spectrometric measurements** were carried out on a Jeol four sector instrument (FAB, with *m*-nitrobenzylalcohol [*m*-NBA] as matrix) or on a Bruker Solarix XR ESI/MALDI FT-ICR MS instrument (ESI, acetonitrile containing formic acid as solvent).

**Elemental analyses** were performed by the microanalytical services of the Department of Chemistry, University of Copenhagen.

**X-ray crystallographic studies** employed single crystals of **1** – **6** that were coated with mineral oil, placed on nylon loops, and mounted in the nitrogen cold stream of the diffractometer. The single-crystal X-ray diffraction studies were performed at 122(2) K on a Bruker D8 VENTURE diffractometer equipped with a Mo  $K\alpha$  high-brilliance  $I\mu\text{S}$  radiation source ( $\lambda = 0.71073 \text{ \AA}$ ), a multilayer X-ray mirror and a PHOTON 100 CMOS detector, and an Oxford Cryosystems low temperature device. The instrument was controlled with the APEX2 software package using SAINT.<sup>10</sup> Final cell constants were obtained from least squares fits of several thousand strong reflections. Intensity data were corrected for absorption using intensities of redundant reflections with the program SADABS.<sup>11</sup> The structures were solved in Olex2 using the olex2.solve<sup>12</sup> program (Charge Flipping) and refined using the olex2.refine program<sup>13</sup> or SHELXL.<sup>14</sup> All non-hydrogen atoms were refined anisotropically; in disordered fragments, the least occupant parts were refined isotropically, if necessary. Hydrogen atoms were placed at calculated positions and refined as riding atoms with isotropic displacement parameters ( $U_{\text{iso}} = 1.2 U_{\text{eq}}$  of the parent atom, except for methyl hydrogens which were constrained to  $1.5 U_{\text{eq}}$  of the parent atom). Disorder was treated with appropriate choices of the EADP, ISOR, and SADI commands. CCDC entries 1433236-1433241 contain the crystallographic data reported herein. These data can be obtained free of charge from The Cambridge

Crystallographic Data Centre via [www.ccdc.cam.ac.uk/data\\_request/cif](http://www.ccdc.cam.ac.uk/data_request/cif). Selected crystallographic details are listed in Table S1 below.

**Table S1.** Crystallographic data for **1 – 6**.

|                                                     |                                                                                                                                                            |                                                                                                                       |                                                                                                                                                           |
|-----------------------------------------------------|------------------------------------------------------------------------------------------------------------------------------------------------------------|-----------------------------------------------------------------------------------------------------------------------|-----------------------------------------------------------------------------------------------------------------------------------------------------------|
| Compound                                            | <b>1 (CCDC 1433236)</b>                                                                                                                                    | <b>2 (CCDC 1433237)</b>                                                                                               | <b>3 (CCDC 1433238)</b>                                                                                                                                   |
| Empirical formula                                   | C <sub>95.19</sub> H <sub>158.33</sub> Cl <sub>11.82</sub> Mo <sub>3</sub> O <sub>0.40</sub> P <sub>4</sub> Pd <sub>2</sub> Ru <sub>2</sub> S <sub>4</sub> | C <sub>65</sub> H <sub>97</sub> Cl <sub>11</sub> Mo <sub>3</sub> O <sub>3</sub> P <sub>2</sub> PtRuS <sub>5</sub>     | C <sub>94.65</sub> H <sub>154.79</sub> Cl <sub>12.35</sub> O <sub>0.22</sub> P <sub>4</sub> Pd <sub>2</sub> Ru <sub>2</sub> S <sub>4</sub> W <sub>3</sub> |
| Formula weight                                      | 2682.91                                                                                                                                                    | 2122.59                                                                                                               | 2952.62                                                                                                                                                   |
| Temperature / K                                     | 122(2)                                                                                                                                                     | 122(2)                                                                                                                | 122(2)                                                                                                                                                    |
| Crystal system                                      | triclinic                                                                                                                                                  | monoclinic                                                                                                            | triclinic                                                                                                                                                 |
| Space group                                         | <i>P</i> -1                                                                                                                                                | <i>P</i> 2 <sub>1</sub> / <i>c</i>                                                                                    | <i>P</i> -1                                                                                                                                               |
| <i>a</i> / Å                                        | 13.8281(9)                                                                                                                                                 | 22.0554(19)                                                                                                           | 13.8702(4)                                                                                                                                                |
| <i>b</i> / Å                                        | 17.5883(11)                                                                                                                                                | 9.9627(9)                                                                                                             | 17.6143(5)                                                                                                                                                |
| <i>c</i> / Å                                        | 23.8941(16)                                                                                                                                                | 36.388(3)                                                                                                             | 23.8397(8)                                                                                                                                                |
| $\alpha$ / °                                        | 80.217(2)                                                                                                                                                  | 90                                                                                                                    | 80.2950(10)                                                                                                                                               |
| $\beta$ / °                                         | 75.331(2)                                                                                                                                                  | 93.738(2)                                                                                                             | 75.2550(10)                                                                                                                                               |
| $\gamma$ / °                                        | 84.330(3)                                                                                                                                                  | 90                                                                                                                    | 83.9490(10)                                                                                                                                               |
| <i>V</i> / Å <sup>3</sup>                           | 5530.7(6)                                                                                                                                                  | 7978.5(12)                                                                                                            | 5540.0(3)                                                                                                                                                 |
| <i>Z</i>                                            | 2                                                                                                                                                          | 4                                                                                                                     | 2                                                                                                                                                         |
| $\rho_{\text{calc}}$ / g cm <sup>-3</sup>           | 1.611                                                                                                                                                      | 1.767                                                                                                                 | 1.770                                                                                                                                                     |
| $\mu$ / mm <sup>-1</sup>                            | 1.374                                                                                                                                                      | 2.972                                                                                                                 | 4.156                                                                                                                                                     |
| $2\theta$ range for data collection / °             | 4.496 to 51.362                                                                                                                                            | 4.488 to 50.054                                                                                                       | 4.346 to 52.044                                                                                                                                           |
| Reflections collected                               | 125278                                                                                                                                                     | 107771                                                                                                                | 84030                                                                                                                                                     |
| Independent reflections                             | 20984 [ <i>R</i> <sub>int</sub> = 0.0605]                                                                                                                  | 14078 [ <i>R</i> <sub>int</sub> = 0.0701]                                                                             | 21806 [ <i>R</i> <sub>int</sub> = 0.0423]                                                                                                                 |
| Restraints / parameters                             | 6 / 1132                                                                                                                                                   | 56 / 884                                                                                                              | 8 / 1119                                                                                                                                                  |
| Goodness-of-fit on <i>F</i> <sup>2</sup>            | 1.018                                                                                                                                                      | 1.120                                                                                                                 | 1.043                                                                                                                                                     |
| Final <i>R</i> indexes [ <i>I</i> > 2σ( <i>I</i> )] | <i>R</i> <sub>1</sub> = 0.0314, <i>wR</i> <sub>2</sub> = 0.0630                                                                                            | <i>R</i> <sub>1</sub> = 0.0553, <i>wR</i> <sub>2</sub> = 0.1049                                                       | <i>R</i> <sub>1</sub> = 0.0359, <i>wR</i> <sub>2</sub> = 0.0755                                                                                           |
| Final <i>R</i> indexes [all data]                   | <i>R</i> <sub>1</sub> = 0.0482, <i>wR</i> <sub>2</sub> = 0.0686                                                                                            | <i>R</i> <sub>1</sub> = 0.0789, <i>wR</i> <sub>2</sub> = 0.1117                                                       | <i>R</i> <sub>1</sub> = 0.0533, <i>wR</i> <sub>2</sub> = 0.0839                                                                                           |
| Largest diff. peak / hole / e Å <sup>-3</sup>       | 2.24 / -1.83                                                                                                                                               | 2.19 / -1.24                                                                                                          | 3.40 / -2.14                                                                                                                                              |
| Compound                                            | <b>4 (CCDC 1433239)</b>                                                                                                                                    | <b>5 (CCDC 1433240)</b>                                                                                               | <b>6 (CCDC 1433241)</b>                                                                                                                                   |
| Empirical formula                                   | C <sub>65</sub> H <sub>97</sub> Cl <sub>11</sub> O <sub>3</sub> P <sub>2</sub> PtRuS <sub>5</sub> W <sub>3</sub>                                           | C <sub>47</sub> H <sub>86.5</sub> BCl <sub>5</sub> CuF <sub>4</sub> O <sub>0.75</sub> P <sub>2</sub> RuS <sub>3</sub> | C <sub>46.92</sub> H <sub>84.77</sub> AgCl <sub>3.08</sub> F <sub>3</sub> O <sub>3.64</sub> P <sub>2</sub> RuS <sub>4</sub>                               |
| Formula weight                                      | 2386.32                                                                                                                                                    | 1250.45                                                                                                               | 1272.44                                                                                                                                                   |
| Temperature / K                                     | 122(2)                                                                                                                                                     | 122(2)                                                                                                                | 122(2)                                                                                                                                                    |
| Crystal system                                      | monoclinic                                                                                                                                                 | triclinic                                                                                                             | orthorhombic                                                                                                                                              |
| Space group                                         | <i>P</i> 2 <sub>1</sub> / <i>c</i>                                                                                                                         | <i>P</i> -1                                                                                                           | <i>P</i> 2 <sub>1</sub> 2 <sub>1</sub> 2 <sub>1</sub>                                                                                                     |
| <i>a</i> / Å                                        | 22.1025(17)                                                                                                                                                | 9.636(3)                                                                                                              | 9.5010(4)                                                                                                                                                 |
| <i>b</i> / Å                                        | 9.9658(8)                                                                                                                                                  | 17.256(5)                                                                                                             | 22.3773(10)                                                                                                                                               |
| <i>c</i> / Å                                        | 36.424(3)                                                                                                                                                  | 18.491(7)                                                                                                             | 27.2642(11)                                                                                                                                               |
| $\alpha$ / °                                        | 90                                                                                                                                                         | 91.100(14)                                                                                                            | 90                                                                                                                                                        |
| $\beta$ / °                                         | 93.775(2)                                                                                                                                                  | 97.986(16)                                                                                                            | 90                                                                                                                                                        |
| $\gamma$ / °                                        | 90                                                                                                                                                         | 99.976(12)                                                                                                            | 90                                                                                                                                                        |
| <i>V</i> / Å <sup>3</sup>                           | 8005.8(11)                                                                                                                                                 | 2995.8(16)                                                                                                            | 5796.6(4)                                                                                                                                                 |
| <i>Z</i>                                            | 4                                                                                                                                                          | 1                                                                                                                     | 4                                                                                                                                                         |
| $\rho_{\text{calc}}$ / g cm <sup>-3</sup>           | 1.980                                                                                                                                                      | 1.386                                                                                                                 | 1.458                                                                                                                                                     |
| $\mu$ / mm <sup>-1</sup>                            | 6.799                                                                                                                                                      | 1.032                                                                                                                 | 0.987                                                                                                                                                     |
| $2\theta$ range for data collection / °             | 4.594 to 50.054                                                                                                                                            | 4.454 to 55.756                                                                                                       | 4.54 to 50.054                                                                                                                                            |
| Reflections collected                               | 119943                                                                                                                                                     | 42665                                                                                                                 | 61707                                                                                                                                                     |
| Independent reflections                             | 14116 [ <i>R</i> <sub>int</sub> = 0.0985]                                                                                                                  | 14016 [ <i>R</i> <sub>int</sub> = 0.0327]                                                                             | 10245 [ <i>R</i> <sub>int</sub> = 0.1039]                                                                                                                 |
| Restraints / parameters                             | 14 / 839                                                                                                                                                   | 42 / 703                                                                                                              | 60 / 633                                                                                                                                                  |
| Goodness-of-fit on <i>F</i> <sup>2</sup>            | 1.118                                                                                                                                                      | 1.030                                                                                                                 | 1.051                                                                                                                                                     |
| Final <i>R</i> indexes [ <i>I</i> > 2σ( <i>I</i> )] | <i>R</i> <sub>1</sub> = 0.0520, <i>wR</i> <sub>2</sub> = 0.0977                                                                                            | <i>R</i> <sub>1</sub> = 0.0547, <i>wR</i> <sub>2</sub> = 0.1475                                                       | <i>R</i> <sub>1</sub> = 0.0442, <i>wR</i> <sub>2</sub> = 0.0823                                                                                           |
| Final <i>R</i> indexes [all data]                   | <i>R</i> <sub>1</sub> = 0.0814, <i>wR</i> <sub>2</sub> = 0.1056                                                                                            | <i>R</i> <sub>1</sub> = 0.0691, <i>wR</i> <sub>2</sub> = 0.1593                                                       | <i>R</i> <sub>1</sub> = 0.0678, <i>wR</i> <sub>2</sub> = 0.0919                                                                                           |
| Largest diff. peak / hole / e Å <sup>-3</sup>       | 2.94 / -1.69                                                                                                                                               | 2.37 / -1.77                                                                                                          | 1.09 / -0.58                                                                                                                                              |



**Electrochemical measurements** were carried out under a nitrogen atmosphere with anhydrous dichloromethane as the solvent and with tetrabutylammonium hexafluorophosphate as the electrolyte (0.20 M). The instrumentation has been described meticulously by Zanello.<sup>15</sup> The reference electrode used for the measurements of **1** – **3** was a Ag/AgCl (3 M KCl) electrode rather than a saturated calomel electrode, which previously was used to measure the analogous PPh<sub>3</sub> complexes.<sup>3</sup> The cyclic voltammograms shown below (Figures S17 – S19) are referenced to the Ag/AgCl (3 M KCl) electrode. To allow comparisons between M<sub>3</sub>S<sub>4</sub>ML systems with L = PPh<sub>3</sub> and **RuC**, the square wave voltammetry potentials are referenced to the ferrocene-ferrocenium redox couple rather than the reference electrodes, taking  $E^{\ominus}$  <sub>2+/3+</sub> of ferrocene as 0.

## Supporting figures

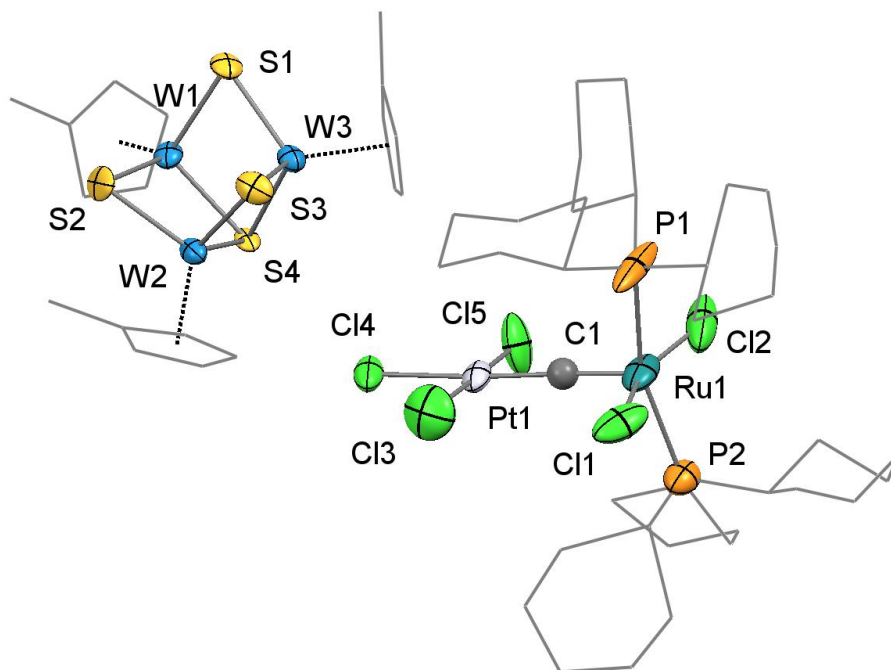

**Figure S1.** Representation of the decomposition product,  $[(WCp')_3S_4][(Cy_3P)_2Cl_2Ru\equiv C-PtCl_3]$ , which forms when **4** is left in chloroform solution for prolonged periods. Cp' and Cy of are shown as wireframe. The structure was solved partially. Unit cell data: triclinic  $P\bar{1}$ ,  $a = 11.610(2)$  Å,  $b = 13.640(3)$  Å,  $c = 24.753(5)$  Å,  $\alpha = 95.001(6)^\circ$ ,  $\beta = 103.462(6)^\circ$ ,  $\gamma = 112.757(6)^\circ$ ,  $V = 3446.1$  Å<sup>3</sup>.

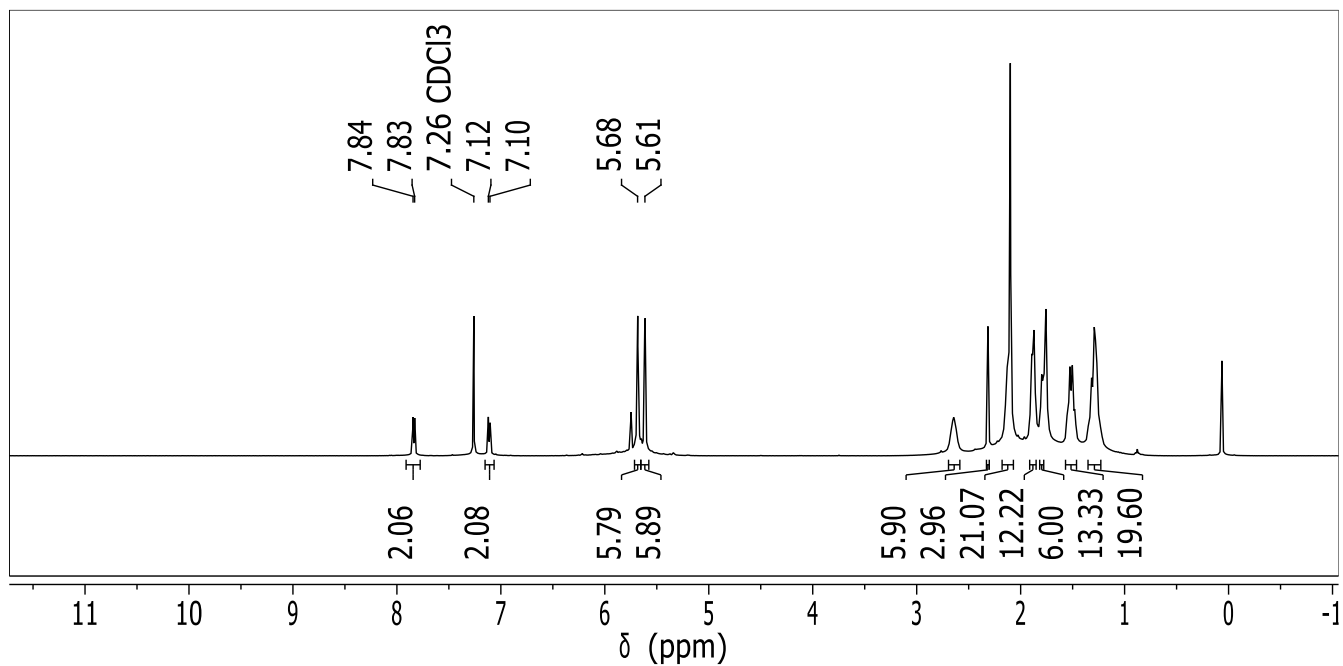

**Figure S2.** <sup>1</sup>H-NMR spectrum of **2**. The signals at 0.88 ppm and 5.75 ppm arise from traces of pentane and cyclopentadienide.

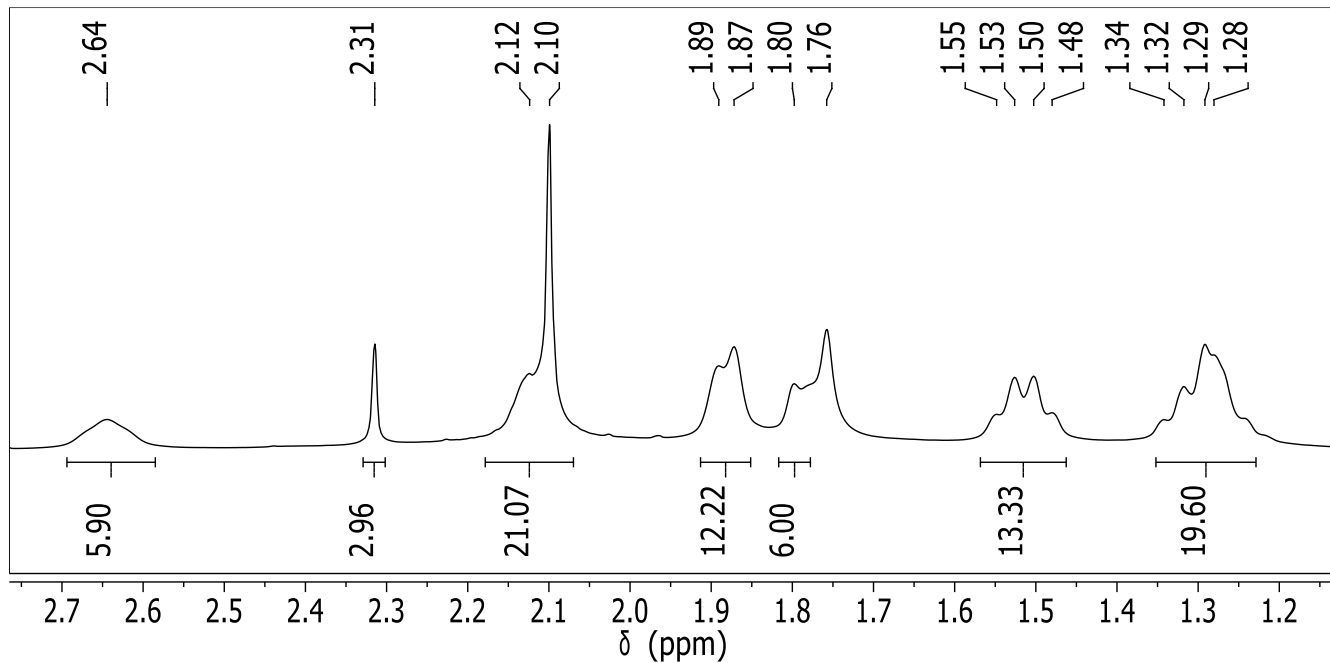

**Figure S3.** <sup>1</sup>H-NMR spectrum of **2**, magnification. The signal at 1.76 arises from a trace of water.

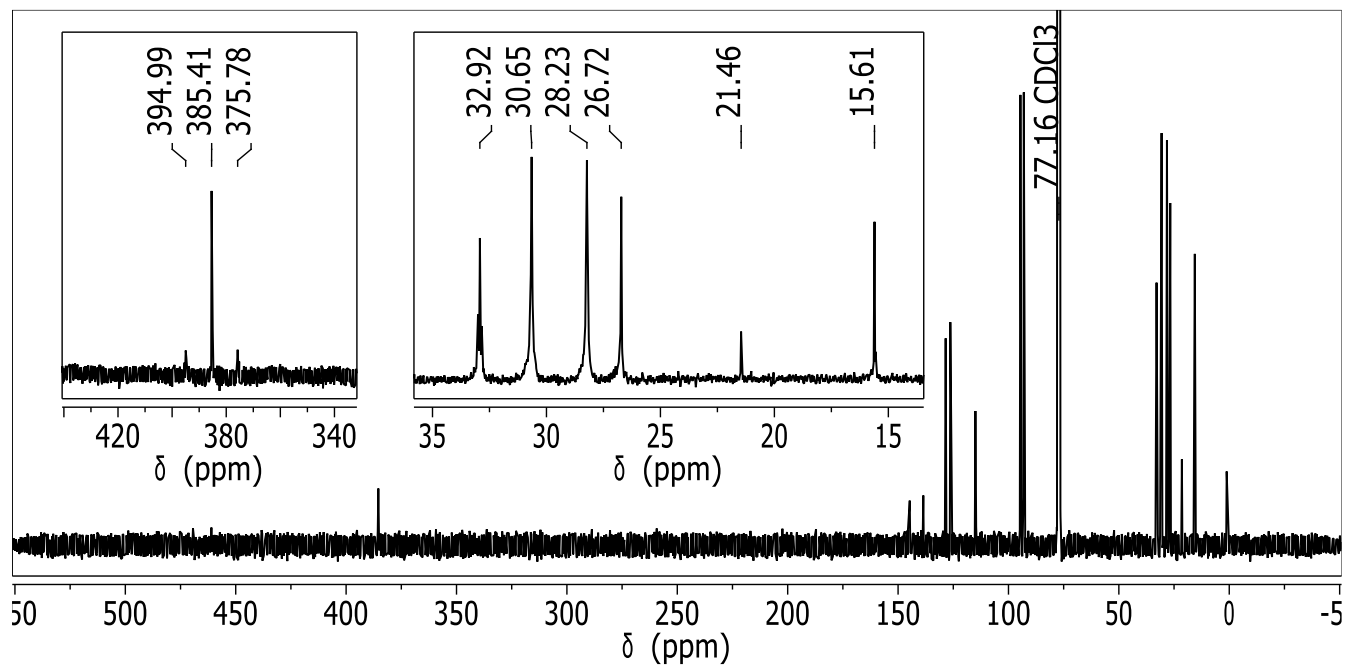

**Figure S4.**  $^{13}\text{C}$ -NMR spectrum of **2**.

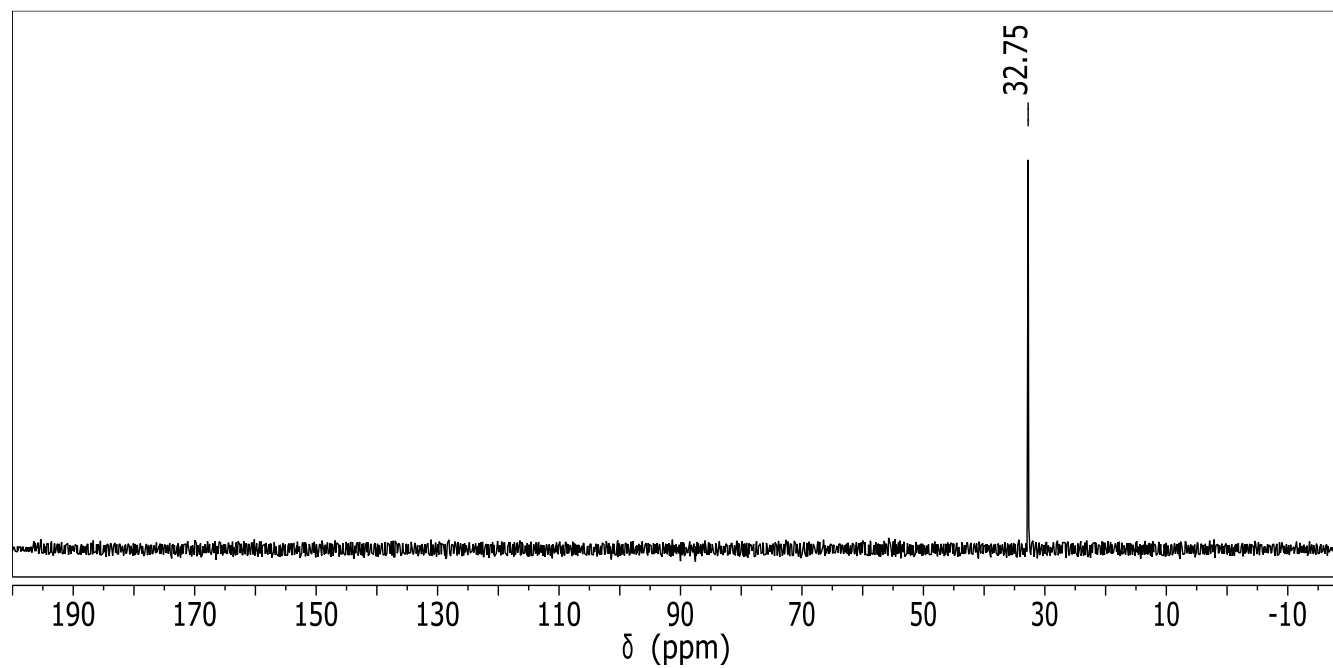

**Figure S5.**  $^{31}\text{P}$ -NMR spectrum of **2**.

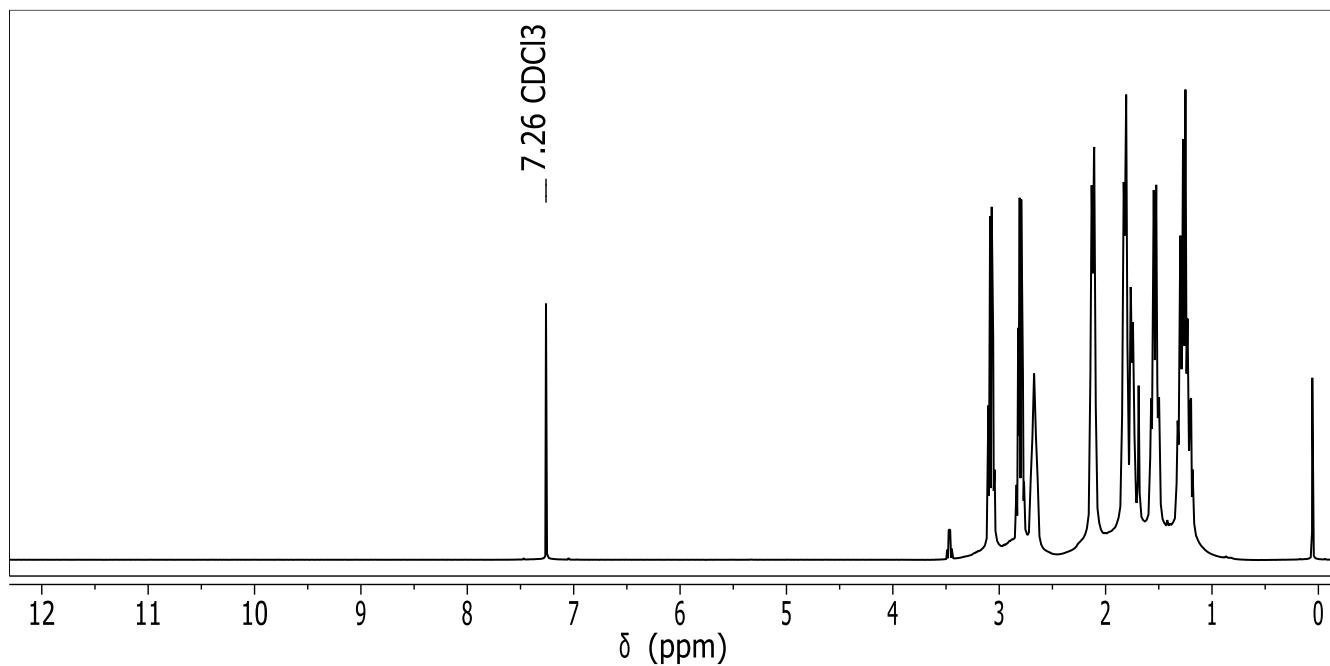

**Figure S6.**  $^1\text{H-NMR}$  spectrum of **5**.

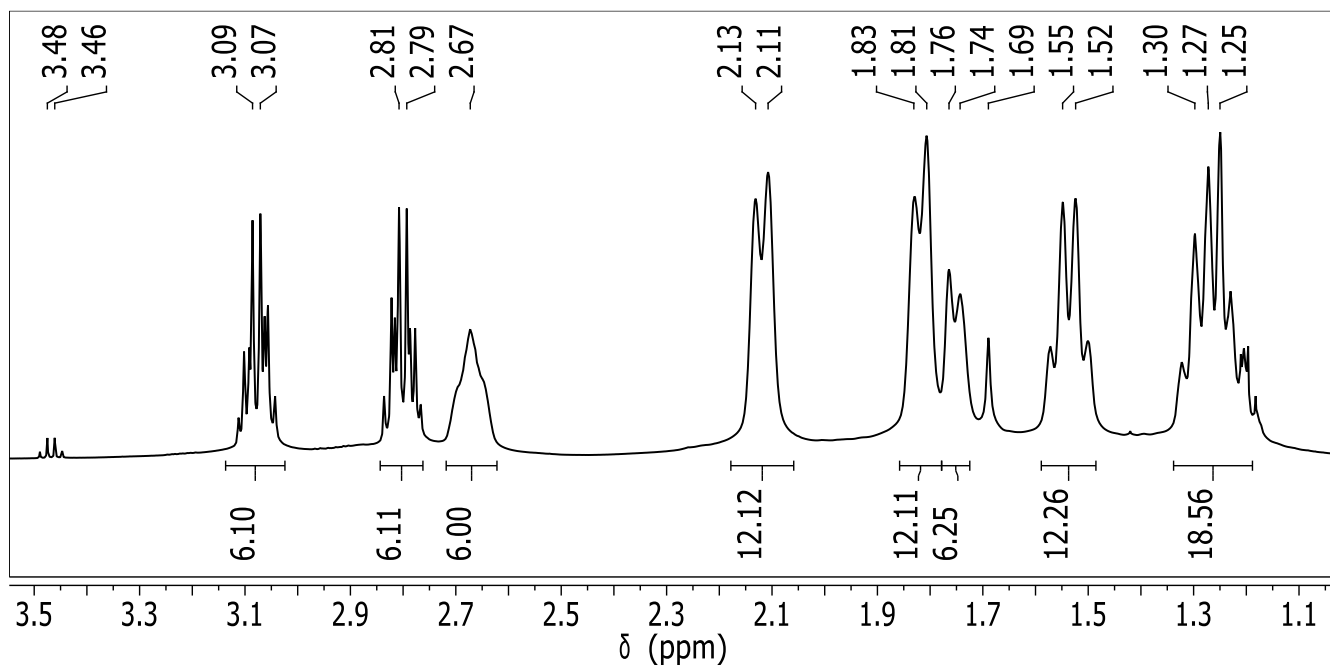

**Figure S7.**  $^1\text{H-NMR}$  spectrum of **5**, magnification. The signals at 3.48 ppm and 1.69 arise from traces of diethyl ether and water.

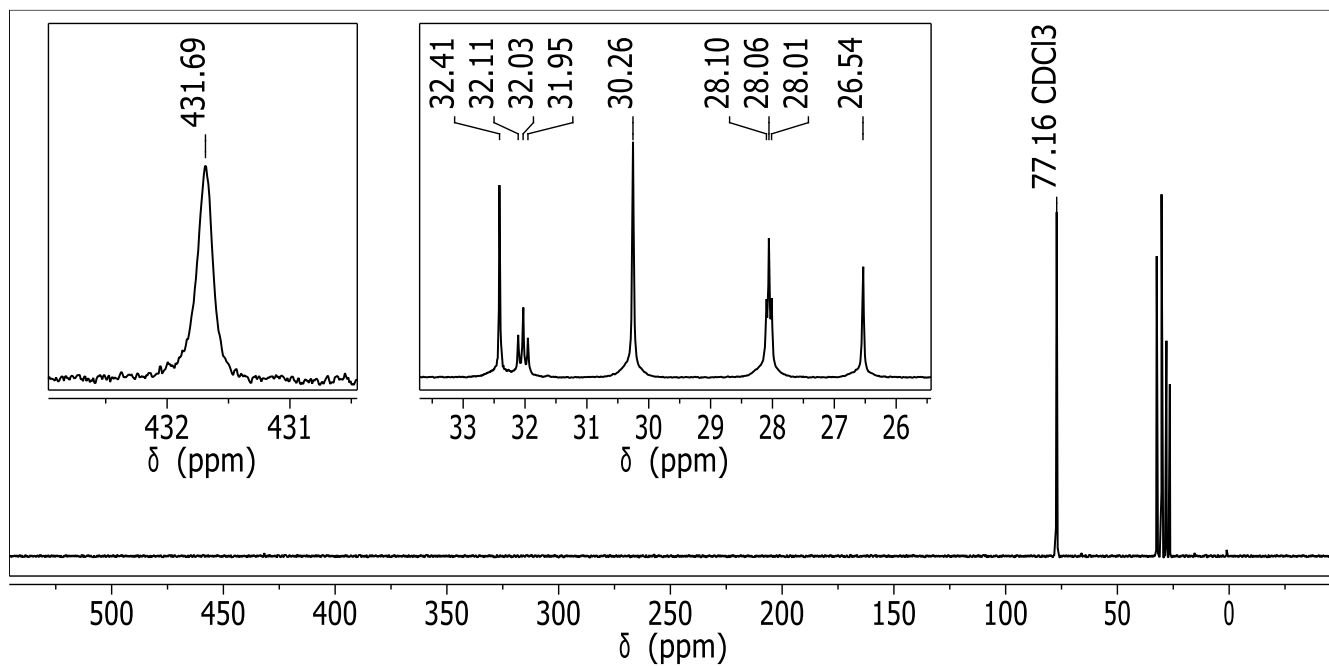

**Figure S8.**  $^{13}\text{C}$ -NMR spectrum of **5**.

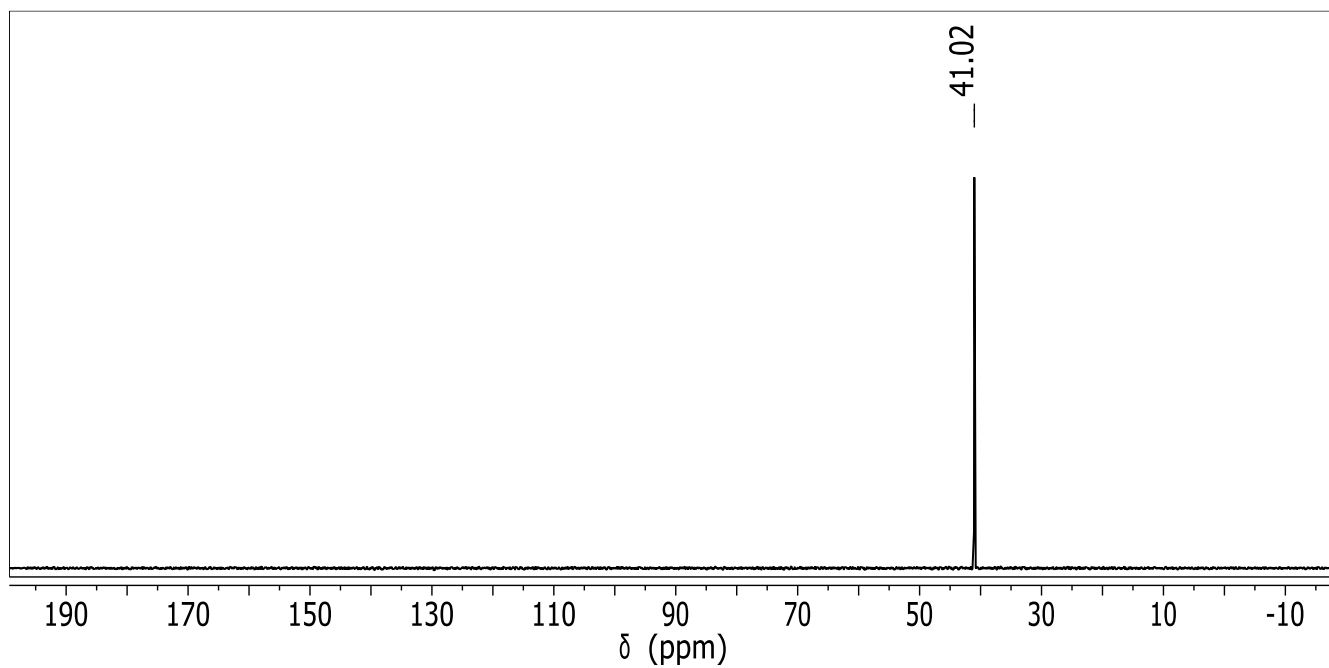

**Figure S9.**  $^{31}\text{P}$ -NMR spectrum of **5**.

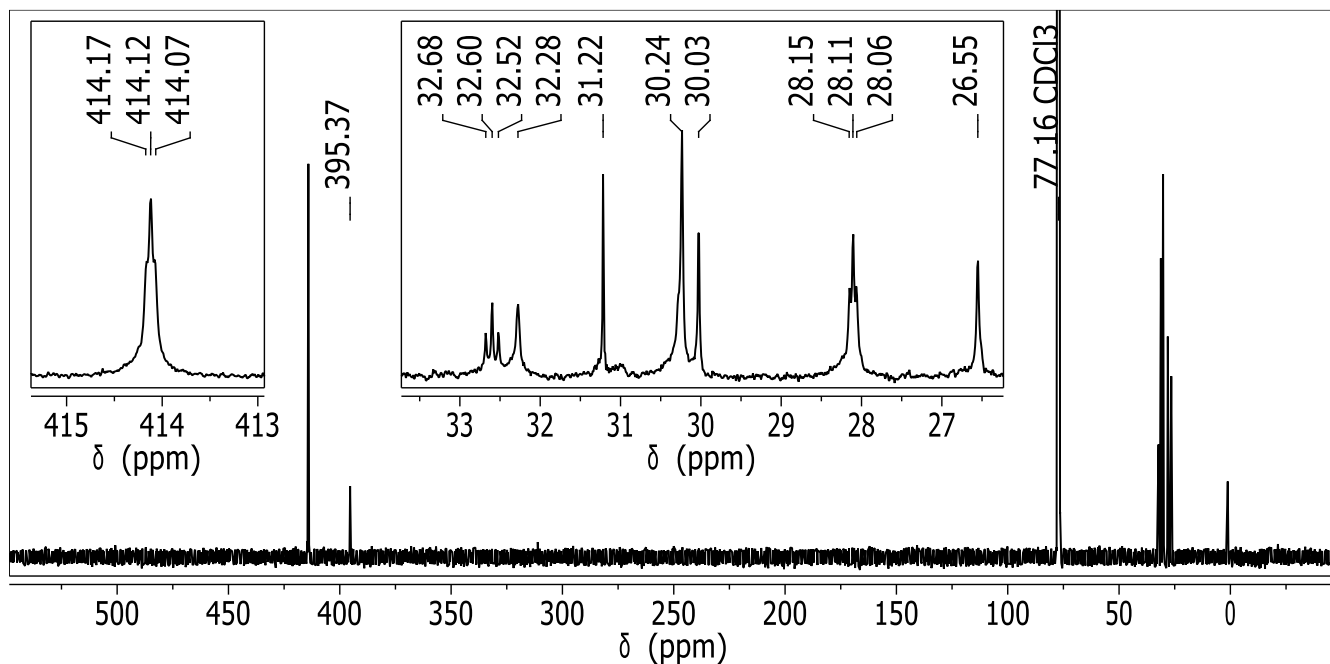

**Figure S10.**  $^{13}\text{C}$ -NMR spectrum of the reaction mixture containing **7**.

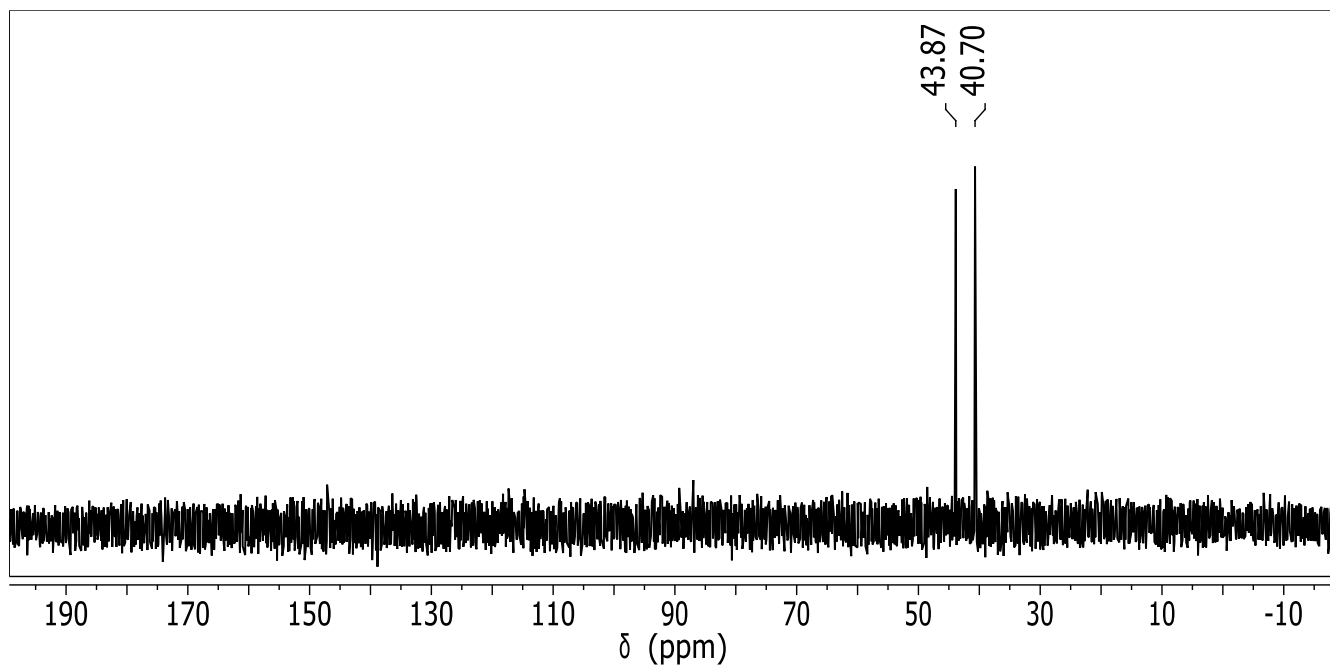

**Figure S11.**  $^{31}\text{P}$ -NMR spectrum of the reaction mixture containing **7**. The resonance at 43.87 ppm arises from  $(\text{Cy}_3\text{P})_2\text{Cl}_2\text{Ru}\equiv\text{C}-\text{AuCl}$  [ $\delta(^{31}\text{P}) = 43.86$  ppm].<sup>8</sup>  $\{(\text{Cy}_3\text{P})_2\text{Cl}_2\text{Ru}\equiv\text{C}\}_2\text{Au}^+$  is absent [ $\delta(^{31}\text{P}) = 51.11$  ppm].<sup>8</sup>

## Generic Display Report

### Analysis Info

Analysis Name D:\Data\analyser-routine\acq0878\_000001.d  
Method XR\_ESI\_pos\_400\_2000\_4M  
Sample Name RuCAu(ttcn)+  
Comment

Acquisition Date 11/10/2014 9:00:56 AM

Operator  
Instrument solarIX XR

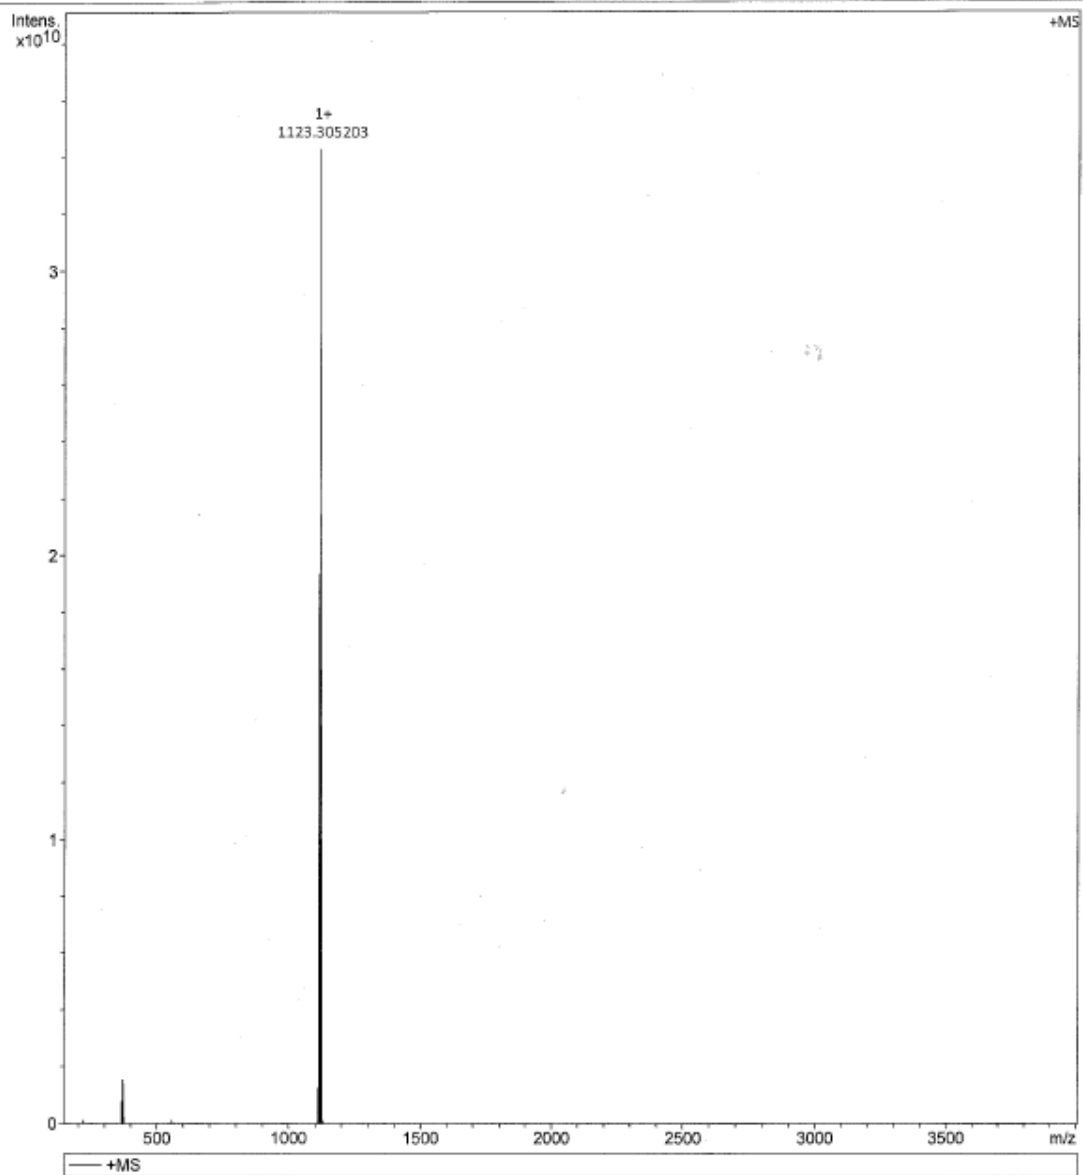

**Figure S12.** ESI<sup>+</sup> MS spectrum of 7.



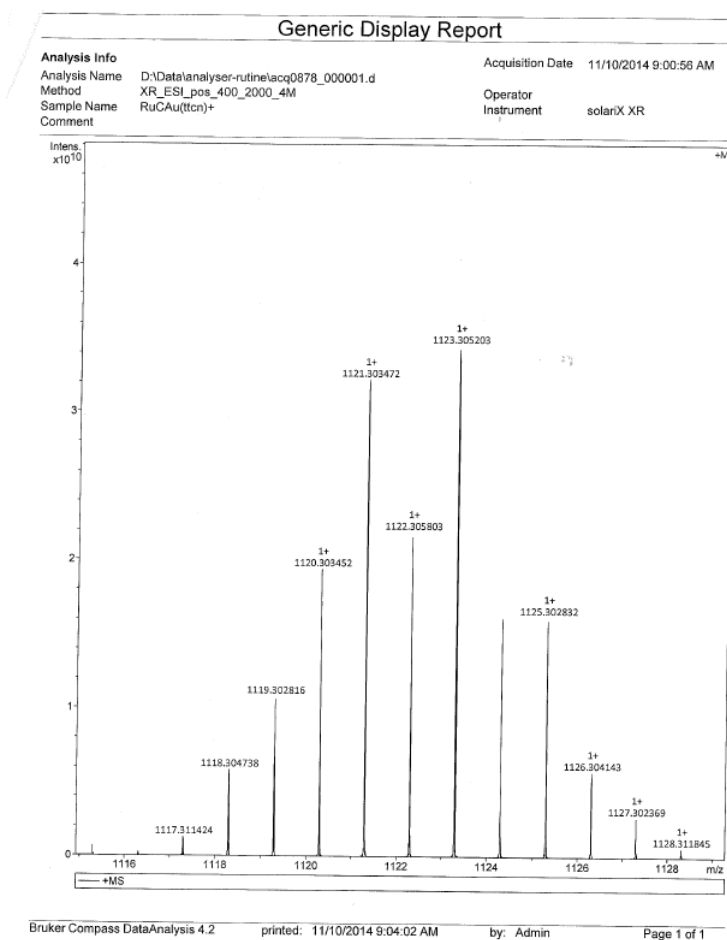

**Figure S13.** ESI<sup>+</sup> MS spectrum of **7**.

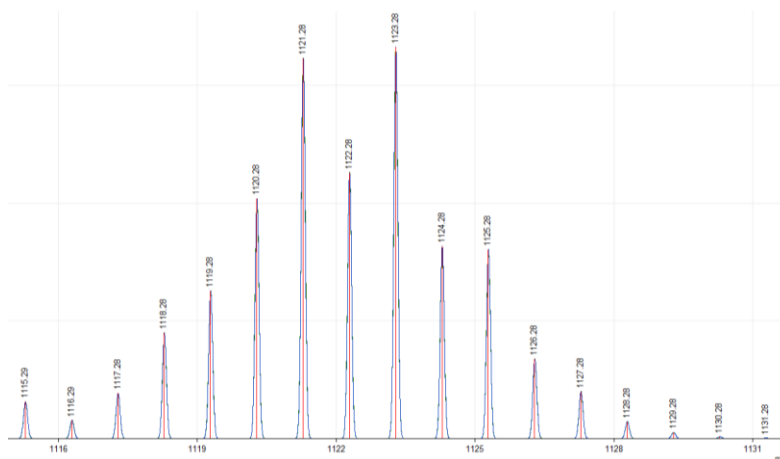

**Figure S14.** Simulated mass spectrum of the cation in **7**. (Using mMass: Strohm M., Kavan D., Novák P., Volný M., Havlíček V., *Anal Chem* 82 (11), 4648-4651 (2010), DOI: [10.1021/ac100818g](https://doi.org/10.1021/ac100818g))

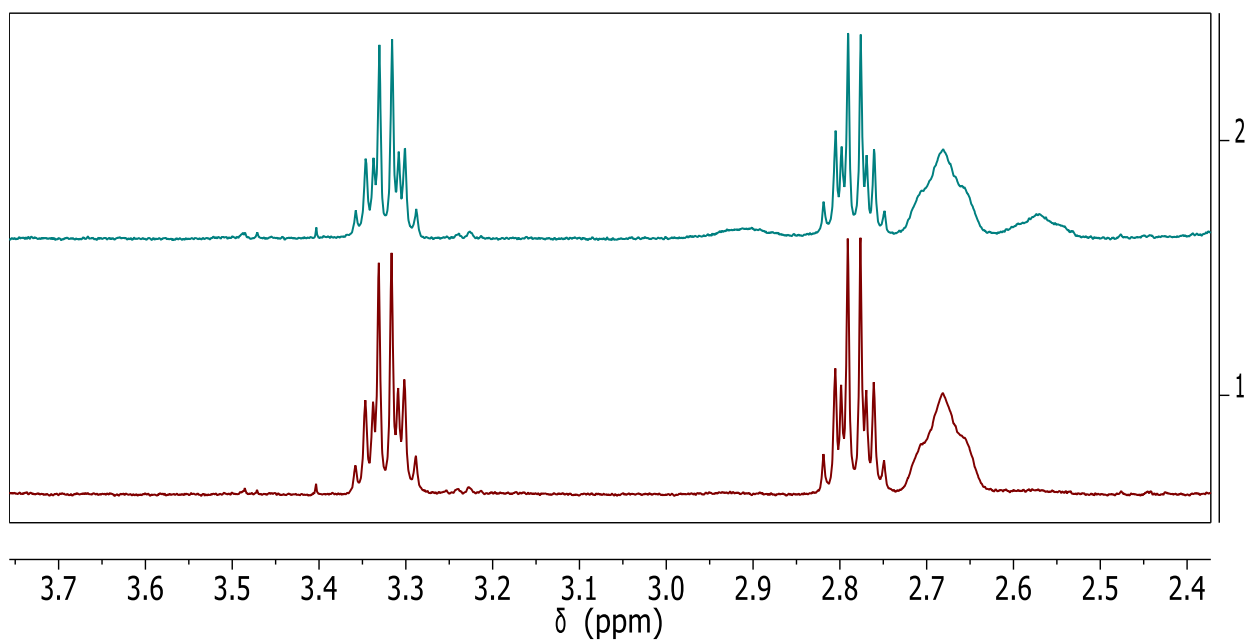

**Figure S15.**  $^1\text{H-NMR}$ : conversion of **5** (multiplet at 2.68 ppm) to **3** (multiplet at 2.57 ppm) upon reaction with  $[(\text{WCp}')_3\text{S}_4\text{Pd}(\text{dba})]\text{OTs}$ . Spectra 1 and 2 were recorded after 15 min and 21 h.

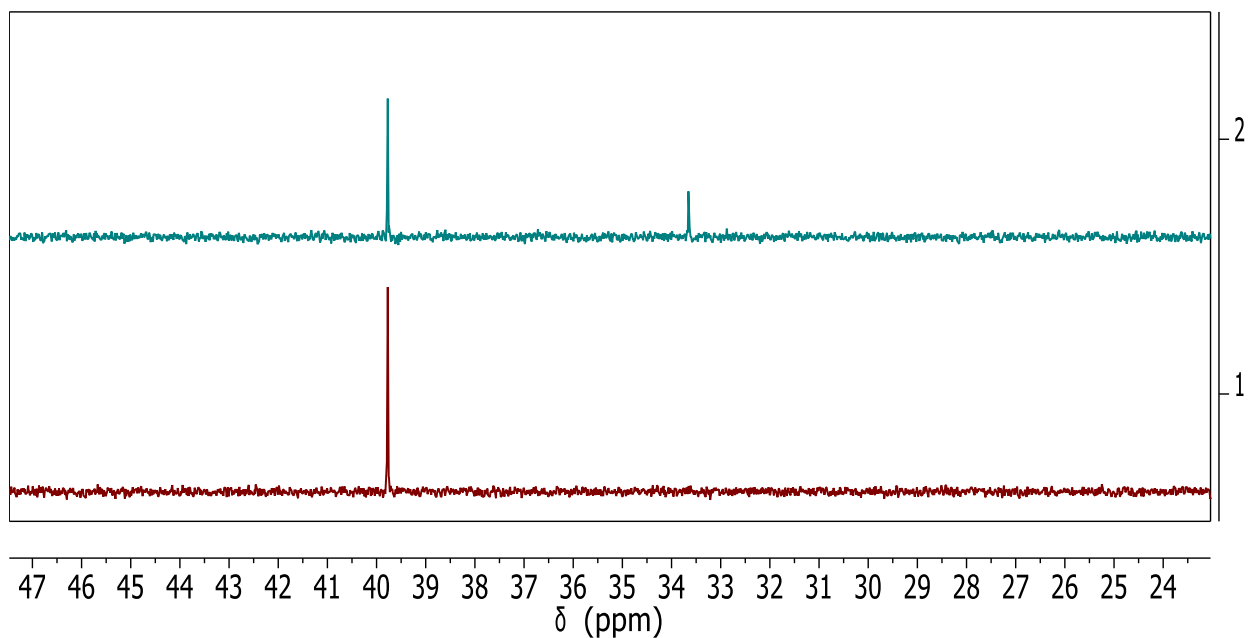

**Figure S16.**  $^{31}\text{P-NMR}$ : conversion of **5** (resonance at 39.8 ppm) to **3** (resonance at 33.7 ppm) upon reaction with  $[(\text{WCp}')_3\text{S}_4\text{Pd}(\text{dba})]\text{OTs}$ . Spectra 1 and 2 were recorded after 15 min and 21 h.

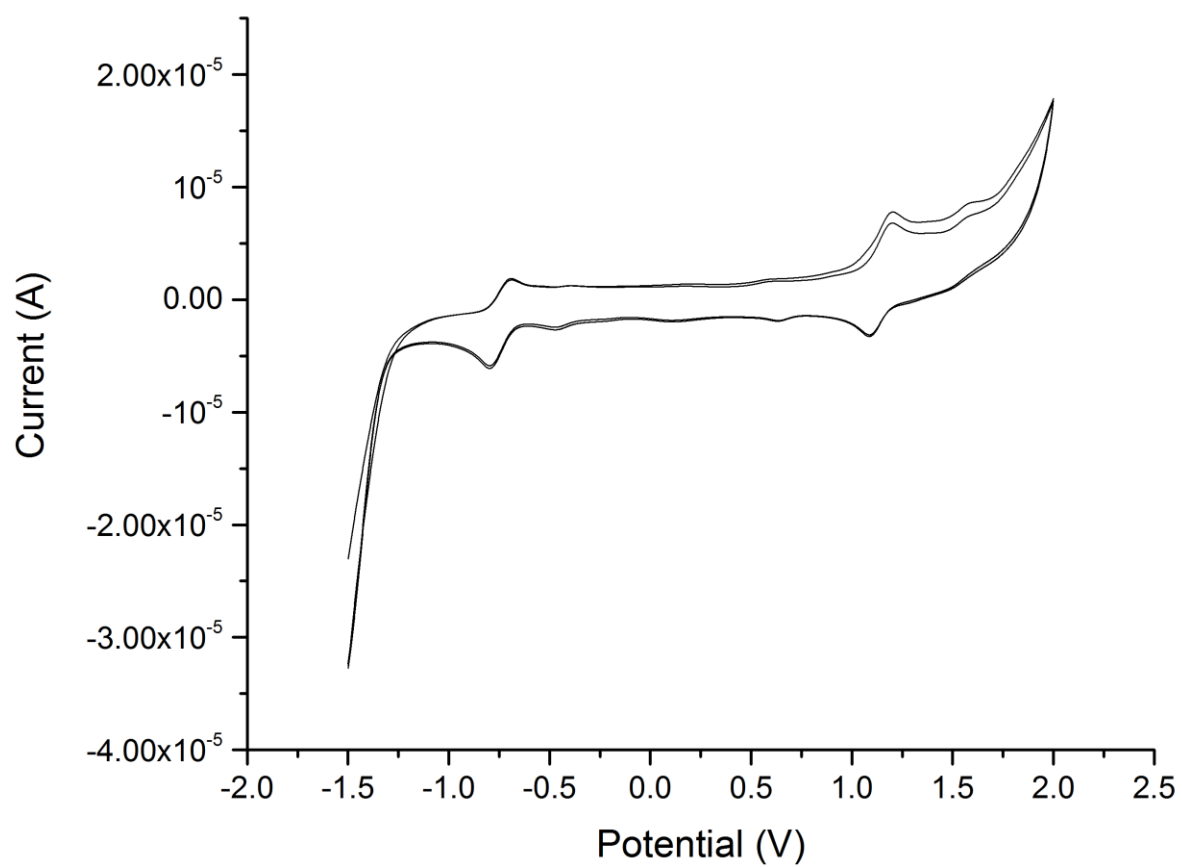

**Figure S17.** Cyclic voltammogram of **1**. The potentials are referenced to the Ag/AgCl (3 M KCl) electrode. Scan rate:  $0.4 \text{ V s}^{-1}$ .

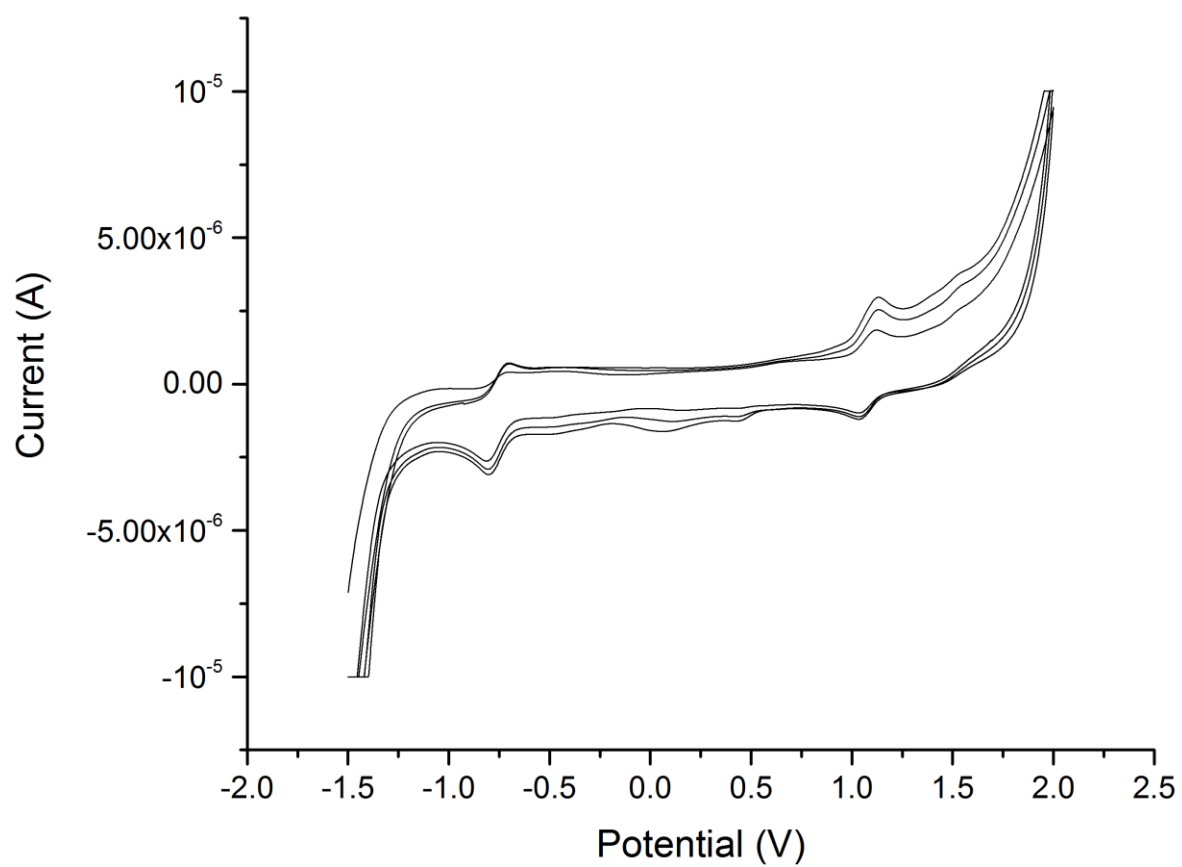

**Figure S18.** Cyclic voltammogram of **2**. The potentials are referenced to the Ag/AgCl (3 M KCl) electrode. Scan rate:  $0.2 \text{ V s}^{-1}$ .

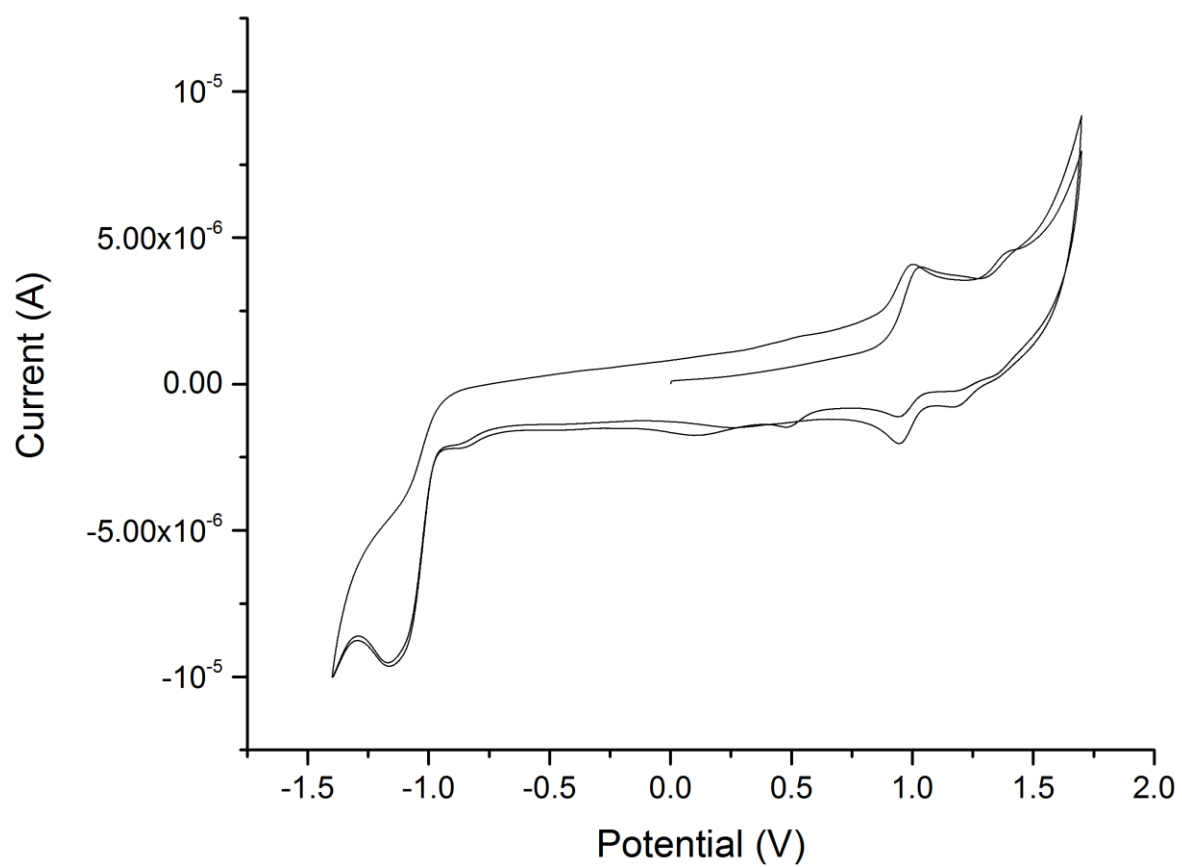

**Figure S19.** Cyclic voltammogram of **3**. The potentials are referenced to the Ag/AgCl (3 M KCl) electrode. Scan rate:  $1.0 \text{ V s}^{-1}$ .

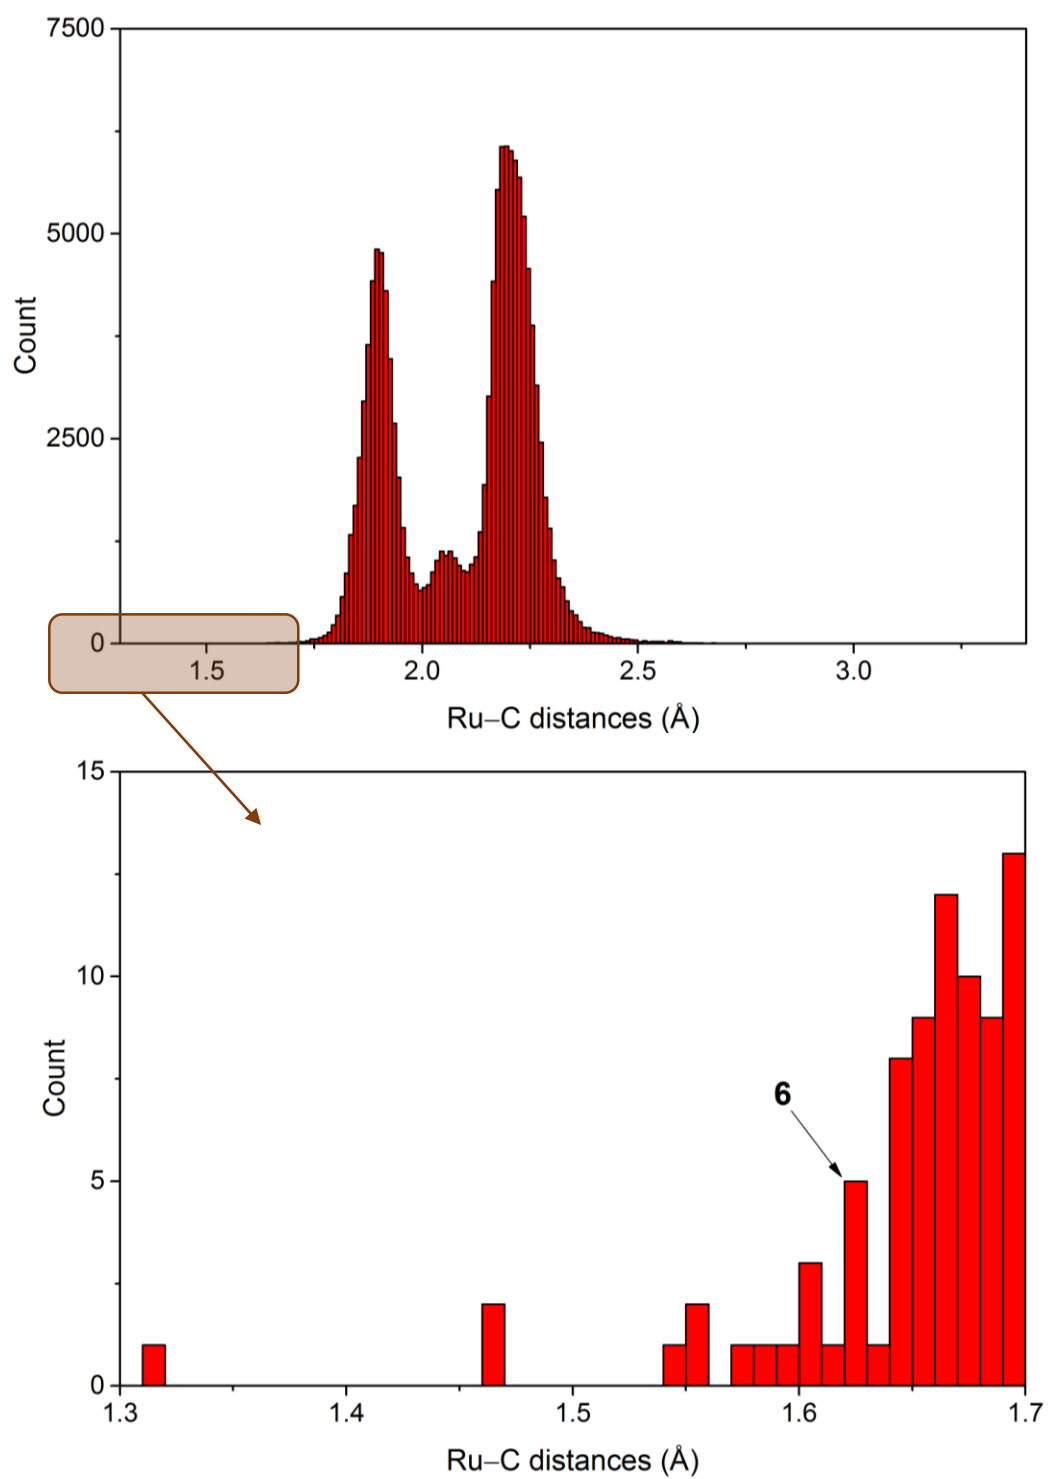

**Figure S20.** Histogram with Ru-C distances from the Cambridge Structural Database v. 1.17, and a zoom on the range where the Ru-C distance in **6** falls (shortest 0.01%).

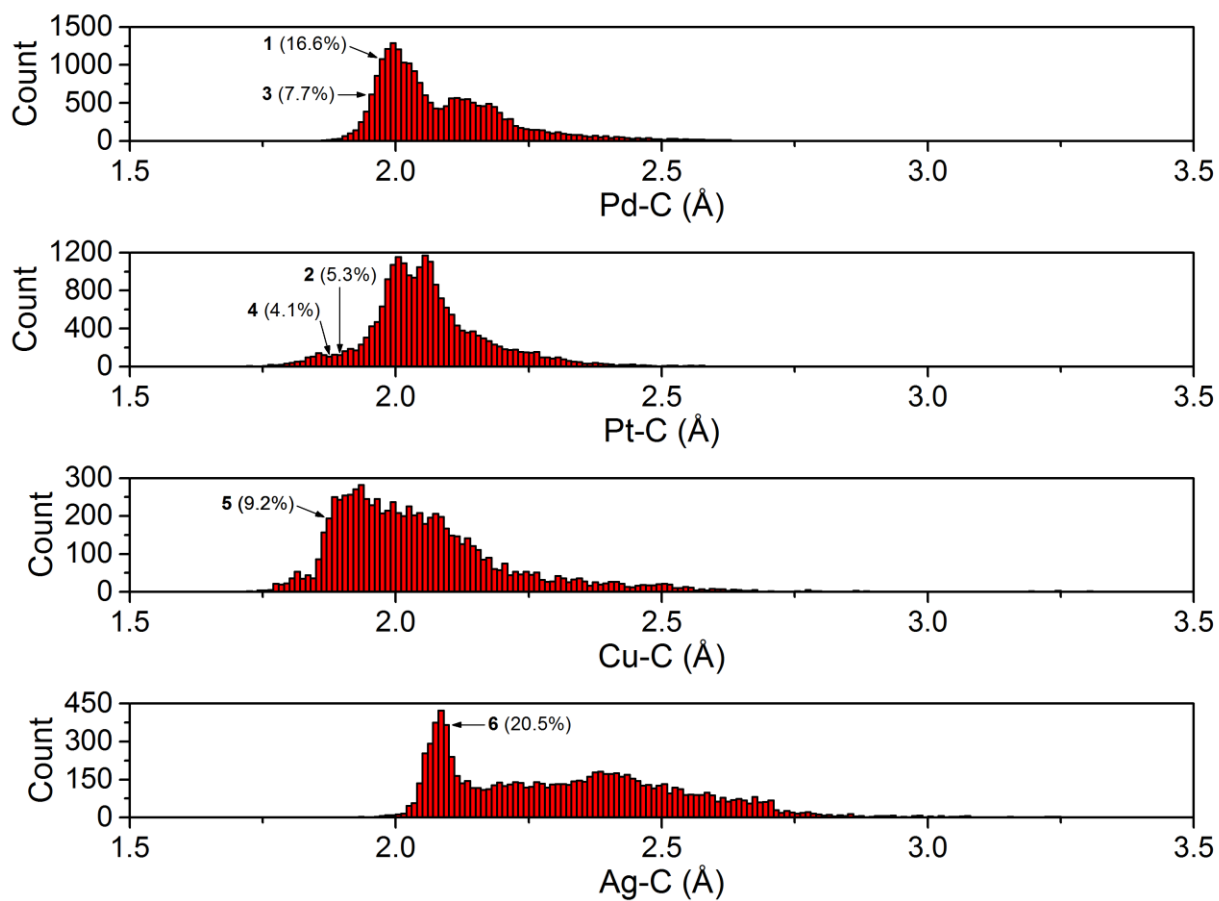

**Figure S21.** Histograms with M-C distances (M = Pd, Pt, Cu, and Ag) from the Cambridge Structural Database v. 1.17. **Ru**C-M distances are indicated by arrows.

## References

1. S. R. Caskey, M. H. Stewart, J. E. Kivela, J. R. Sootsman, M. J. A. Johnson and J. W. Kampf, *J. Am. Chem. Soc.*, 2005, **127**, 16750-16751.
2. K. Herbst, B. Rink, L. Dahlenburg and M. Brorson, *Organometallics*, 2001, **20**, 3655-3660.
3. K. Herbst, P. Zanello, M. Corsini, N. D'Amelio, L. Dahlenburg and M. Brorson, *Inorg. Chem.*, 2003, **42**, 974-981.
4. D. Sellmann and L. Zapf, *Angew. Chem.*, 1984, **96**, 799-800.
5. G. J. Kubas, B. Monzyk and A. L. Crumbliss, in *Inorg. Synth.*, John Wiley & Sons, Inc., 1979, vol. 19, pp. 90-92.
6. P. J. Blower, J. A. Clarkson, S. C. Rawle, J. R. Hartman, R. E. Wolf, R. Yagbasan, S. G. Bott and S. R. Cooper, *Inorg. Chem.*, 1989, **28**, 4040-4046.
7. R. Uson, A. Laguna, M. Laguna, D. A. Briggs, H. H. Murray and J. P. Fackler, in *Inorg. Synth.*, John Wiley & Sons, Inc., 1989, vol. 26, pp. 85-91.
8. A. Reinholdt, J. E. Vibenholt, T. J. Morsing, M. Schau-Magnussen, N. E. A. Reeler and J. Bendix, *Chem. Sci.*, 2015, **6**, 5815-5823.
9. R. Uson, J. Fornies, M. Tomas, I. Ara, J. M. Casas and A. Martin, *J. Chem. Soc., Dalton Trans.*, 1991, DOI: 10.1039/DT9910002253, 2253-2264.
10. Bruker; Bruker AXS, Inc. SAINT, Version 7.68A; Bruker AXS: Madison, WI, 2009.
11. G. Sheldrick, SADABS, Version 2008/2; University of Göttingen: Germany, 2003.
12. O. V. Dolomanov, L. J. Bourhis, R. J. Gildea, J. A. K. Howard and H. Puschmann, *J. Appl. Crystallogr.*, 2009, **42**, 339-341.
13. L. J. Bourhis, O. V. Dolomanov, R. J. Gildea, J. A. K. Howard and H. Puschmann, *Acta Crystallogr., Sect. A*, 2015, **71**, 59-75.
14. G. Sheldrick, *Acta Crystallogr., Sect. A*, 2008, **64**, 112-122.
15. P. Zanello, F. Laschi, M. Fontani, C. Mealli, A. Ienco, K. Tang, X. Jin and L. Li, *J. Chem. Soc., Dalton Trans.*, 1999, DOI: 10.1039/A807500J, 965-970.
